# Supplementary material for: Pd(ii) and Ni(ii) complexes featuring a “phosphasalen” ligand: synthesis and DFT study
Source: Royal Society of Chemistry journal article supplement (doi:10.1039/c1dt10906e), 2011-01-01
Supplement: c1dt10906e.pdf [file c1dt10906e.pdf]

**Supporting information for:**

**Pd(II) and Ni(II) complexes featuring a  
“phosphasalen” ligand: synthesis and DFT study**

*Thi-Phuong-Anh Cao, Stéphanie Labouille, Audrey Auffrant, \* Yves Jean, \* Xavier F. Le Goff,  
and Pascal Le Floch<sup>†</sup>*

Laboratoire Hétéroéléments et Coordination, Ecole Polytechnique, CNRS, 91128 Palaiseau  
Cedex, France. Fax: (+33)(0)169334440;

E-mail: [audrey.auffrant@polytechnique.edu](mailto:audrey.auffrant@polytechnique.edu); [yves.jean@polytechnique.edu](mailto:yves.jean@polytechnique.edu)

## Table of contents

|                                                                         |     |
|-------------------------------------------------------------------------|-----|
| Complete Gaussian reference.....                                        | S3  |
| Optimized structure of [Ni(salen)] complex in singlet state.....        | S4  |
| Optimized structure of [Ni(salen)] complex in triplet state.....        | S6  |
| Optimized structure of [Ni(phosphasalen)] complex in singlet state..... | S8  |
| Optimized structure of [Ni(phosphasalen)] complex in triplet state..... | S12 |

Gaussian 03, Revision C.02, M. J. Frisch, G. W. Trucks, H. B. Schlegel, G. E. Scuseria, M. A. Robb, J. R. Cheeseman, J. A. Montgomery, Jr., T. Vreven, K. N. Kudin, J. C. Burant, J. M. Millam, S. S. Iyengar, J. Tomasi, V. Barone, B. Mennucci, M. Cossi, G. Scalmani, N. Rega, G. A. Petersson, H. Nakatsuji, M. Hada, M. Ehara, K. Toyota, R. Fukuda, J. Hasegawa, Ishida, T. Nakajima, Y. Honda, O. Kitao, H. Nakai, M. Klene, X. Li, J. E. Knox, H. P. Hratchian, J. B. Cross, C. Adamo, J. Jaramillo, R. Gomperts, R. E. Stratmann, O. Yazyev, A. J. Austin, R. Cammi, C. Pomelli, J. W. Ochterski, P. Y. Ayala, K. Morokuma, G. A. Voth, P. Salvador, J. J. Dannenberg, V. G. Zakrzewski, S. Dapprich, A. D. Daniels, M. C. Strain, O. Farkas, D. K. Malick, A. D. Rabuck, K. Raghavachari, J. B. Foresman, J. V. Ortiz, Q. Cui, A. G. Baboul, S. Clifford, J. Cioslowski, B. B. Stefanov, G. Liu, A. Liashenko, P. Piskorz, I. Komaromi, R. L. Martin, D. J. Fox, T. Keith, M. A. Al-Laham, C. Y. Peng, A. Nanayakkara, M. Challacombe, P. M. W. Gill, B. Johnson, W. Chen, M. W. Wong, C. Gonzalez, and J. A. Pople, Gaussian, Inc., Wallingford CT, 2004

### Optimized structure of [Ni(salen)] complex in singlet state

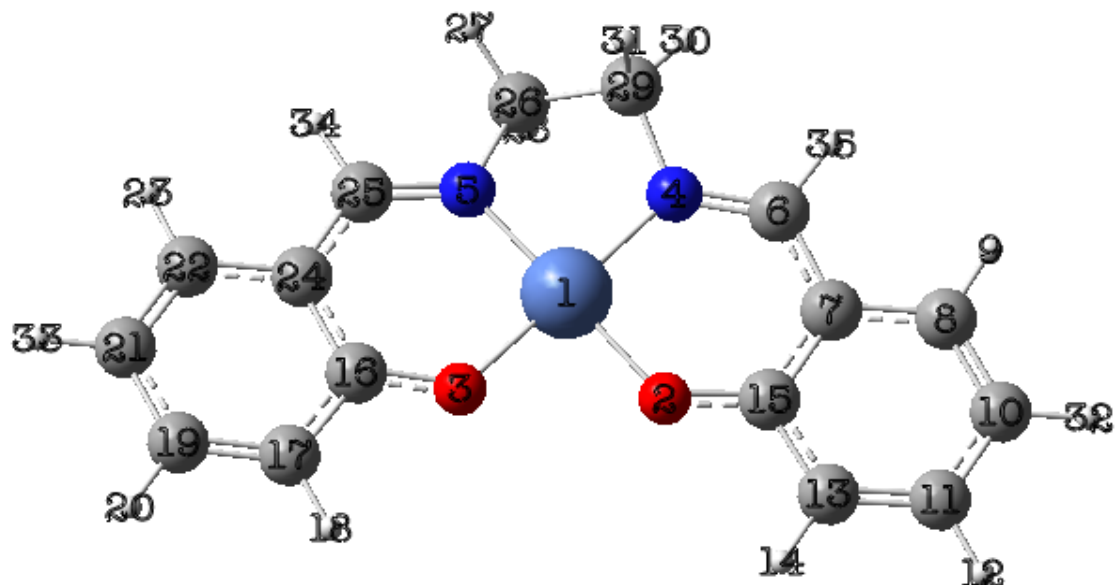

HF=-1047.1931335

| Center Number | Atomic Number | Atomic Type | Coordinates (Angstroms) |           |           |
|---------------|---------------|-------------|-------------------------|-----------|-----------|
|               |               |             | X                       | Y         | Z         |
| 1             | 28            | 0           | 0.000041                | 0.238643  | 0.000259  |
| 2             | 8             | 0           | 1.254095                | -1.116537 | 0.067676  |
| 3             | 8             | 0           | -1.254114               | -1.116633 | -0.065993 |
| 4             | 7             | 0           | 1.260488                | 1.594082  | 0.151163  |
| 5             | 7             | 0           | -1.260394               | 1.594110  | -0.150925 |
| 6             | 6             | 0           | 2.554255                | 1.461939  | 0.134831  |
| 7             | 6             | 0           | 3.253939                | 0.231302  | 0.033816  |
| 8             | 6             | 0           | 4.670272                | 0.242065  | -0.015934 |
| 9             | 1             | 0           | 5.182484                | 1.203108  | -0.000577 |
| 10            | 6             | 0           | 5.391795                | -0.926979 | -0.080686 |
| 11            | 6             | 0           | 4.694858                | -2.155970 | -0.090578 |
| 12            | 1             | 0           | 5.256561                | -3.086518 | -0.139128 |
| 13            | 6             | 0           | 3.319583                | -2.204423 | -0.039193 |
| 14            | 1             | 0           | 2.782729                | -3.148223 | -0.045968 |
| 15            | 6             | 0           | 2.540698                | -1.013120 | 0.020552  |
| 16            | 6             | 0           | -2.540702               | -1.013179 | -0.020032 |
| 17            | 6             | 0           | -3.319721               | -2.204409 | 0.039754  |
| 18            | 1             | 0           | -2.782928               | -3.148237 | 0.047457  |
| 19            | 6             | 0           | -4.695029               | -2.155851 | 0.090012  |
| 20            | 1             | 0           | -5.256822               | -3.086347 | 0.138576  |
| 21            | 6             | 0           | -5.391915               | -0.926838 | 0.078966  |
| 22            | 6             | 0           | -4.670285               | 0.242139  | 0.014253  |
| 23            | 1             | 0           | -5.182454               | 1.203192  | -0.001945 |
| 24            | 6             | 0           | -3.253921               | 0.231308  | -0.034416 |
| 25            | 6             | 0           | -2.554168               | 1.461920  | -0.135163 |
| 26            | 6             | 0           | -0.662066               | 2.906644  | -0.372684 |
| 27            | 1             | 0           | -1.321844               | 3.715743  | -0.034281 |
| 28            | 1             | 0           | -0.479786               | 3.036548  | -1.448369 |
| 29            | 6             | 0           | 0.662173                | 2.906536  | 0.373311  |
| 30            | 1             | 0           | 1.321942                | 3.715737  | 0.035127  |

|    |   |   |           |           |           |
|----|---|---|-----------|-----------|-----------|
| 31 | 1 | 0 | 0.479925  | 3.036121  | 1.449037  |
| 32 | 1 | 0 | 6.476699  | -0.909358 | -0.120174 |
| 33 | 1 | 0 | -6.476850 | -0.909179 | 0.117555  |
| 34 | 1 | 0 | -3.156580 | 2.372453  | -0.219204 |
| 35 | 1 | 0 | 3.156686  | 2.372477  | 0.218659  |

---

|             |    |         |         |         |
|-------------|----|---------|---------|---------|
|             |    | 1       | 2       | 3       |
|             |    | A       | A       | A       |
| Frequencies | -- | 29.6272 | 57.9980 | 83.4556 |
| Red. masses | -- | 6.2569  | 4.2643  | 5.6874  |
| Frc consts  | -- | 0.0032  | 0.0085  | 0.0233  |
| IR Inten    | -- | 1.8842  | 0.0069  | 0.0940  |

| Atom | AN | X     | Y     | Z     | X     | Y     | Z     | X     | Y     | Z     |
|------|----|-------|-------|-------|-------|-------|-------|-------|-------|-------|
| 1    | 28 | 0.00  | 0.00  | 0.13  | 0.00  | 0.01  | 0.00  | 0.00  | -0.03 | 0.00  |
| 2    | 8  | 0.00  | 0.00  | 0.20  | -0.01 | 0.01  | 0.10  | 0.00  | -0.02 | 0.22  |
| 3    | 8  | 0.00  | 0.00  | 0.20  | 0.01  | 0.01  | -0.10 | 0.00  | -0.02 | -0.22 |
| 4    | 7  | 0.01  | 0.00  | 0.04  | 0.01  | 0.01  | -0.06 | -0.02 | -0.02 | 0.14  |
| 5    | 7  | 0.01  | 0.00  | 0.04  | -0.01 | 0.01  | 0.06  | 0.02  | -0.02 | -0.14 |
| 6    | 6  | 0.01  | 0.01  | -0.06 | 0.01  | 0.01  | -0.14 | -0.02 | 0.00  | 0.15  |
| 7    | 6  | 0.00  | 0.00  | -0.08 | 0.00  | 0.00  | -0.09 | -0.01 | 0.01  | 0.09  |
| 8    | 6  | -0.01 | 0.00  | -0.23 | -0.01 | -0.01 | -0.15 | -0.02 | 0.03  | -0.06 |
| 9    | 1  | -0.01 | 0.01  | -0.34 | 0.00  | -0.02 | -0.29 | -0.03 | 0.04  | -0.11 |
| 10   | 6  | -0.01 | 0.00  | -0.25 | -0.01 | -0.03 | -0.04 | -0.01 | 0.04  | -0.18 |
| 11   | 6  | -0.01 | 0.00  | -0.10 | -0.02 | -0.03 | 0.16  | 0.01  | 0.03  | -0.10 |
| 12   | 1  | -0.01 | 0.00  | -0.11 | -0.02 | -0.03 | 0.26  | 0.01  | 0.04  | -0.18 |
| 13   | 6  | 0.00  | 0.00  | 0.06  | -0.02 | -0.01 | 0.21  | 0.01  | 0.01  | 0.07  |
| 14   | 1  | 0.00  | 0.00  | 0.17  | -0.02 | -0.01 | 0.35  | 0.03  | 0.00  | 0.12  |
| 15   | 6  | 0.00  | 0.00  | 0.06  | -0.01 | 0.00  | 0.07  | 0.00  | 0.00  | 0.13  |
| 16   | 6  | 0.00  | 0.00  | 0.06  | 0.01  | 0.00  | -0.07 | 0.00  | 0.00  | -0.13 |
| 17   | 6  | 0.00  | 0.00  | 0.06  | 0.02  | -0.01 | -0.21 | -0.01 | 0.01  | -0.07 |
| 18   | 1  | 0.00  | 0.00  | 0.17  | 0.02  | -0.01 | -0.35 | -0.03 | 0.00  | -0.12 |
| 19   | 6  | -0.01 | 0.00  | -0.10 | 0.02  | -0.03 | -0.16 | -0.01 | 0.03  | 0.10  |
| 20   | 1  | -0.01 | 0.00  | -0.11 | 0.02  | -0.03 | -0.26 | -0.01 | 0.04  | 0.18  |
| 21   | 6  | -0.01 | 0.00  | -0.25 | 0.01  | -0.03 | 0.04  | 0.01  | 0.04  | 0.18  |
| 22   | 6  | -0.01 | 0.00  | -0.23 | 0.01  | -0.01 | 0.15  | 0.02  | 0.03  | 0.06  |
| 23   | 1  | -0.01 | -0.01 | -0.34 | 0.00  | -0.02 | 0.29  | 0.03  | 0.04  | 0.11  |
| 24   | 6  | 0.00  | 0.00  | -0.08 | 0.00  | 0.00  | 0.09  | 0.01  | 0.01  | -0.09 |
| 25   | 6  | 0.01  | -0.01 | -0.06 | -0.01 | 0.01  | 0.14  | 0.02  | 0.00  | -0.15 |
| 26   | 6  | 0.01  | 0.00  | 0.03  | -0.03 | 0.02  | 0.04  | 0.06  | -0.03 | -0.10 |
| 27   | 1  | 0.01  | 0.00  | 0.03  | -0.01 | 0.01  | 0.10  | 0.01  | -0.02 | -0.23 |
| 28   | 1  | 0.01  | -0.01 | 0.03  | -0.10 | 0.03  | 0.03  | 0.23  | -0.07 | -0.08 |
| 29   | 6  | 0.01  | 0.00  | 0.03  | 0.03  | 0.02  | -0.04 | -0.06 | -0.03 | 0.10  |
| 30   | 1  | 0.01  | 0.00  | 0.03  | 0.01  | 0.01  | -0.10 | -0.01 | -0.02 | 0.23  |
| 31   | 1  | 0.01  | 0.01  | 0.03  | 0.10  | 0.03  | -0.03 | -0.23 | -0.07 | 0.08  |
| 32   | 1  | -0.02 | 0.00  | -0.37 | -0.01 | -0.04 | -0.08 | -0.02 | 0.06  | -0.31 |
| 33   | 1  | -0.02 | 0.00  | -0.37 | 0.01  | -0.04 | 0.08  | 0.02  | 0.06  | 0.31  |
| 34   | 1  | 0.01  | -0.01 | -0.14 | -0.01 | 0.01  | 0.22  | 0.03  | 0.00  | -0.17 |
| 35   | 1  | 0.01  | 0.01  | -0.14 | 0.01  | 0.01  | -0.22 | -0.03 | 0.00  | 0.17  |

### Optimized structure of [Ni(salen)] complex in triplet state

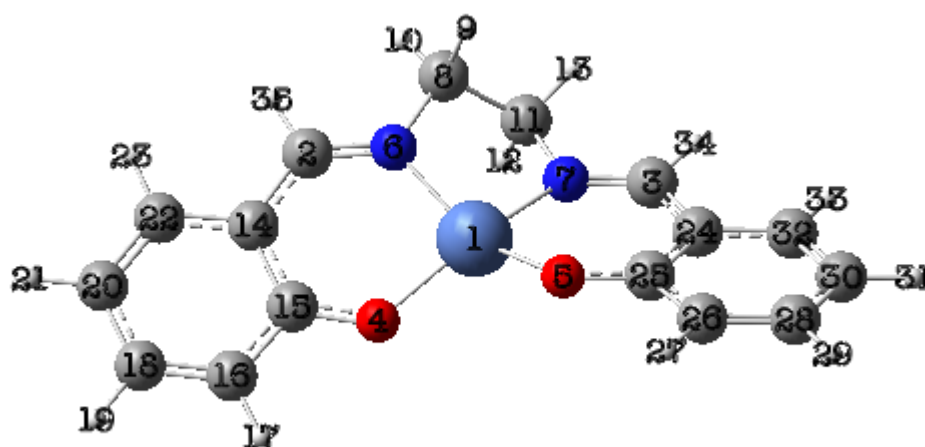

HF=-1047.1788011

| Center Number | Atomic Number | Atomic Type | Coordinates (Angstroms) |           |           |
|---------------|---------------|-------------|-------------------------|-----------|-----------|
|               |               |             | X                       | Y         | Z         |
| 1             | 28            | 0           | -0.439718               | -0.476050 | -0.156478 |
| 2             | 6             | 0           | -0.213068               | 0.276291  | 2.682256  |
| 3             | 6             | 0           | 1.863645                | -0.426269 | -1.986523 |
| 4             | 8             | 0           | -2.139610               | 0.085336  | 0.476245  |
| 5             | 8             | 0           | -0.806197               | -1.598057 | -1.644983 |
| 6             | 7             | 0           | 0.402299                | -0.087837 | 1.602616  |
| 7             | 7             | 0           | 1.379793                | -0.067044 | -0.839880 |
| 8             | 6             | 0           | 1.852221                | -0.069477 | 1.517601  |
| 9             | 1             | 0           | 2.227011                | -1.102133 | 1.537245  |
| 10            | 1             | 0           | 2.311583                | 0.482025  | 2.349865  |
| 11            | 6             | 0           | 2.213568                | 0.566884  | 0.166856  |
| 12            | 1             | 0           | 1.977377                | 1.639355  | 0.205246  |
| 13            | 1             | 0           | 3.285225                | 0.455293  | -0.049540 |
| 14            | 6             | 0           | -1.628994               | 0.425759  | 2.816973  |
| 15            | 6             | 0           | -2.519224               | 0.342150  | 1.690828  |
| 16            | 6             | 0           | -3.898349               | 0.580558  | 1.940498  |
| 17            | 1             | 0           | -4.570207               | 0.521685  | 1.089264  |
| 18            | 6             | 0           | -4.365053               | 0.862506  | 3.207427  |
| 19            | 1             | 0           | -5.429736               | 1.028342  | 3.357837  |
| 20            | 6             | 0           | -3.488363               | 0.945117  | 4.307696  |
| 21            | 1             | 0           | -3.867168               | 1.174158  | 5.299224  |
| 22            | 6             | 0           | -2.142745               | 0.736549  | 4.098733  |
| 23            | 1             | 0           | -1.444532               | 0.804750  | 4.932042  |
| 24            | 6             | 0           | 1.158085                | -1.162499 | -2.988668 |
| 25            | 6             | 0           | -0.142178               | -1.730157 | -2.751988 |
| 26            | 6             | 0           | -0.709993               | -2.501040 | -3.803274 |
| 27            | 1             | 0           | -1.689988               | -2.932946 | -3.622826 |
| 28            | 6             | 0           | -0.053388               | -2.682414 | -5.002328 |

|    |   |   |           |           |           |
|----|---|---|-----------|-----------|-----------|
| 29 | 1 | 0 | -0.527699 | -3.270050 | -5.785505 |
| 30 | 6 | 0 | 1.221338  | -2.125292 | -5.229041 |
| 31 | 1 | 0 | 1.730927  | -2.280263 | -6.175295 |
| 32 | 6 | 0 | 1.809116  | -1.387236 | -4.225554 |
| 33 | 1 | 0 | 2.797880  | -0.955065 | -4.374368 |
| 34 | 1 | 0 | 2.907306  | -0.171891 | -2.215514 |
| 35 | 1 | 0 | 0.387628  | 0.516598  | 3.569886  |

---

|             |    |         |  |         |  |         |
|-------------|----|---------|--|---------|--|---------|
|             |    | 1       |  | 2       |  | 3       |
|             |    | A       |  | A       |  | A       |
| Frequencies | -- | 19.2790 |  | 47.9351 |  | 62.5985 |
| Red. masses | -- | 7.3292  |  | 4.7518  |  | 5.9456  |
| Frc consts  | -- | 0.0016  |  | 0.0064  |  | 0.0137  |
| IR Inten    | -- | 0.8226  |  | 0.0359  |  | 0.0885  |

| Atom | AN | X     | Y     | Z     | X     | Y     | Z     | X     | Y     | Z     |
|------|----|-------|-------|-------|-------|-------|-------|-------|-------|-------|
| 1    | 28 | -0.03 | 0.18  | -0.07 | -0.05 | -0.02 | -0.02 | 0.06  | 0.01  | 0.03  |
| 2    | 6  | -0.01 | -0.08 | -0.01 | 0.00  | -0.14 | 0.01  | 0.00  | 0.01  | 0.01  |
| 3    | 6  | 0.04  | -0.06 | 0.00  | -0.07 | 0.13  | -0.03 | 0.01  | -0.01 | -0.01 |
| 4    | 8  | -0.02 | 0.17  | -0.02 | -0.01 | 0.08  | 0.00  | 0.09  | 0.18  | -0.09 |
| 5    | 8  | -0.05 | 0.15  | -0.03 | 0.03  | -0.08 | 0.00  | 0.08  | -0.13 | 0.14  |
| 6    | 7  | -0.01 | 0.04  | -0.05 | -0.02 | -0.12 | -0.01 | 0.03  | 0.06  | 0.02  |
| 7    | 7  | 0.02  | 0.05  | -0.04 | -0.08 | 0.09  | -0.03 | 0.06  | -0.03 | 0.02  |
| 8    | 6  | -0.01 | 0.00  | -0.04 | -0.03 | -0.09 | -0.05 | 0.03  | 0.05  | 0.03  |
| 9    | 1  | -0.03 | -0.01 | -0.06 | 0.00  | -0.08 | -0.17 | 0.03  | 0.05  | 0.09  |
| 10   | 1  | 0.00  | -0.03 | -0.03 | -0.01 | -0.16 | -0.01 | 0.03  | 0.10  | 0.01  |
| 11   | 6  | 0.02  | 0.02  | -0.03 | -0.09 | 0.06  | 0.00  | 0.06  | -0.02 | 0.00  |
| 12   | 1  | 0.05  | 0.02  | -0.01 | -0.16 | 0.04  | 0.11  | 0.09  | -0.01 | -0.05 |
| 13   | 1  | 0.02  | -0.01 | -0.02 | -0.09 | 0.14  | -0.03 | 0.06  | -0.05 | 0.02  |
| 14   | 6  | 0.00  | -0.09 | 0.01  | 0.01  | -0.07 | 0.02  | -0.01 | -0.01 | -0.03 |
| 15   | 6  | -0.01 | 0.04  | 0.01  | 0.01  | 0.06  | 0.01  | 0.04  | 0.10  | -0.08 |
| 16   | 6  | -0.01 | 0.03  | 0.04  | 0.03  | 0.19  | 0.02  | 0.03  | 0.10  | -0.13 |
| 17   | 1  | -0.01 | 0.13  | 0.04  | 0.03  | 0.31  | 0.01  | 0.08  | 0.19  | -0.18 |
| 18   | 6  | 0.00  | -0.10 | 0.07  | 0.05  | 0.17  | 0.03  | -0.04 | -0.05 | -0.13 |
| 19   | 1  | 0.01  | -0.11 | 0.10  | 0.07  | 0.27  | 0.03  | -0.04 | -0.06 | -0.16 |
| 20   | 6  | 0.01  | -0.23 | 0.08  | 0.05  | 0.02  | 0.04  | -0.09 | -0.19 | -0.07 |
| 21   | 1  | 0.02  | -0.34 | 0.11  | 0.07  | 0.00  | 0.05  | -0.14 | -0.30 | -0.06 |
| 22   | 6  | 0.01  | -0.22 | 0.05  | 0.03  | -0.10 | 0.04  | -0.08 | -0.16 | -0.03 |
| 23   | 1  | 0.01  | -0.32 | 0.06  | 0.03  | -0.21 | 0.04  | -0.12 | -0.25 | 0.02  |
| 24   | 6  | 0.03  | -0.07 | 0.02  | -0.02 | 0.08  | -0.03 | -0.04 | -0.01 | 0.02  |
| 25   | 6  | -0.01 | 0.03  | 0.00  | 0.04  | -0.05 | 0.00  | 0.01  | -0.08 | 0.10  |
| 26   | 6  | -0.02 | 0.01  | 0.03  | 0.12  | -0.15 | 0.04  | -0.03 | -0.08 | 0.12  |
| 27   | 1  | -0.06 | 0.09  | 0.01  | 0.17  | -0.26 | 0.06  | 0.01  | -0.14 | 0.19  |
| 28   | 6  | 0.02  | -0.12 | 0.07  | 0.13  | -0.12 | 0.04  | -0.13 | 0.01  | 0.06  |
| 29   | 1  | 0.01  | -0.14 | 0.08  | 0.19  | -0.20 | 0.06  | -0.16 | 0.01  | 0.07  |
| 30   | 6  | 0.07  | -0.22 | 0.09  | 0.06  | 0.02  | 0.00  | -0.18 | 0.10  | -0.03 |
| 31   | 1  | 0.10  | -0.32 | 0.12  | 0.07  | 0.05  | 0.00  | -0.26 | 0.17  | -0.09 |
| 32   | 6  | 0.07  | -0.20 | 0.06  | -0.01 | 0.12  | -0.03 | -0.13 | 0.08  | -0.05 |
| 33   | 1  | 0.11  | -0.28 | 0.08  | -0.06 | 0.22  | -0.05 | -0.17 | 0.14  | -0.12 |
| 34   | 1  | 0.07  | -0.15 | 0.04  | -0.08 | 0.19  | -0.03 | -0.01 | 0.01  | -0.06 |
| 35   | 1  | 0.00  | -0.19 | 0.02  | 0.02  | -0.19 | 0.01  | -0.04 | -0.02 | 0.04  |

### Optimized structure of [Ni(phosphasalen)] complex in singlet state

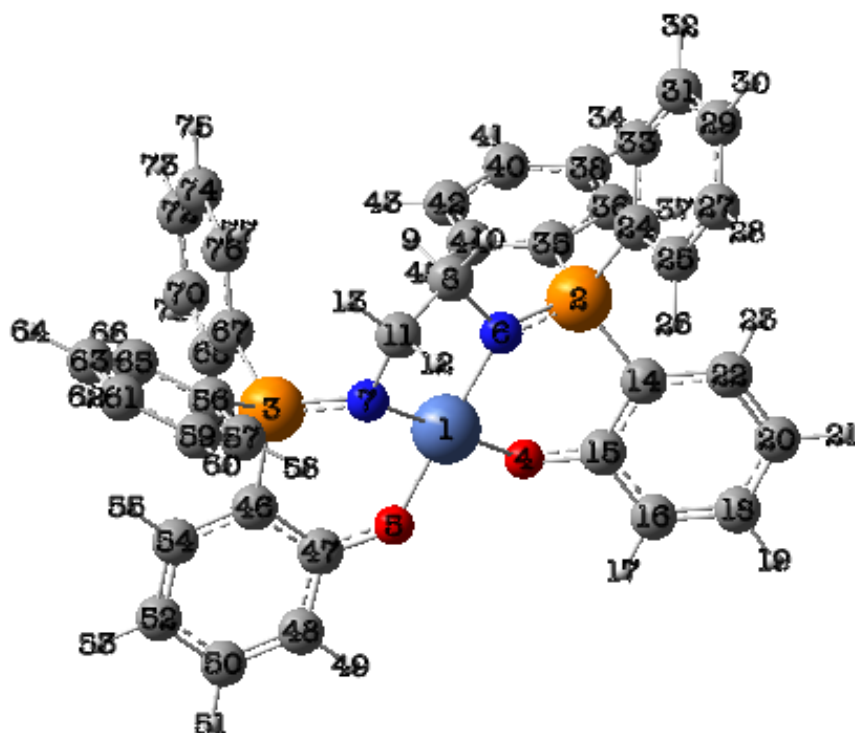

HF=-2578.6169609

| Center Number | Atomic Number | Atomic Type | Coordinates (Angstroms) |           |           |
|---------------|---------------|-------------|-------------------------|-----------|-----------|
|               |               |             | X                       | Y         | Z         |
| 1             | 28            | 0           | 0.124220                | -0.131232 | 0.056752  |
| 2             | 15            | 0           | -0.054642               | -0.072813 | 3.120225  |
| 3             | 15            | 0           | 2.588596                | -0.051800 | -1.697128 |
| 4             | 8             | 0           | -1.446577               | -0.962411 | 0.679462  |
| 5             | 8             | 0           | -0.472384               | -0.676303 | -1.624262 |
| 6             | 7             | 0           | 0.686530                | 0.442558  | 1.771597  |
| 7             | 7             | 0           | 1.692988                | 0.718873  | -0.587608 |
| 8             | 6             | 0           | 2.079740                | 0.884578  | 1.793837  |
| 9             | 1             | 0           | 2.784738                | 0.043410  | 1.901627  |
| 10            | 1             | 0           | 2.273105                | 1.586790  | 2.617980  |
| 11            | 6             | 0           | 2.295023                | 1.560429  | 0.450215  |
| 12            | 1             | 0           | 1.767143                | 2.524235  | 0.454178  |
| 13            | 1             | 0           | 3.358906                | 1.771079  | 0.273815  |
| 14            | 6             | 0           | -1.812762               | -0.055426 | 2.873134  |
| 15            | 6             | 0           | -2.253778               | -0.561199 | 1.614661  |
| 16            | 6             | 0           | -3.659867               | -0.665248 | 1.432999  |
| 17            | 1             | 0           | -4.009304               | -1.047140 | 0.478028  |
| 18            | 6             | 0           | -4.542414               | -0.299047 | 2.431899  |
| 19            | 1             | 0           | -5.612234               | -0.391692 | 2.254447  |
| 20            | 6             | 0           | -4.088070               | 0.194544  | 3.666243  |
| 21            | 1             | 0           | -4.792240               | 0.485643  | 4.440282  |
| 22            | 6             | 0           | -2.723529               | 0.307524  | 3.880242  |



|    |   |   |           |           |           |
|----|---|---|-----------|-----------|-----------|
| 23 | 1 | 0 | -2.355114 | 0.684675  | 4.831779  |
| 24 | 6 | 0 | 0.360262  | 1.040249  | 4.504647  |
| 25 | 6 | 0 | -0.111838 | 2.360570  | 4.434343  |
| 26 | 1 | 0 | -0.747921 | 2.660334  | 3.605571  |
| 27 | 6 | 0 | 0.228188  | 3.280096  | 5.422435  |
| 28 | 1 | 0 | -0.147549 | 4.298237  | 5.364160  |
| 29 | 6 | 0 | 1.048866  | 2.895139  | 6.483845  |
| 30 | 1 | 0 | 1.313412  | 3.614403  | 7.254830  |
| 31 | 6 | 0 | 1.532066  | 1.590054  | 6.552469  |
| 32 | 1 | 0 | 2.176775  | 1.288589  | 7.373975  |
| 33 | 6 | 0 | 1.192160  | 0.664672  | 5.565725  |
| 34 | 1 | 0 | 1.574828  | -0.349988 | 5.624180  |
| 35 | 6 | 0 | 0.431339  | -1.759327 | 3.641069  |
| 36 | 6 | 0 | -0.073963 | -2.338525 | 4.813910  |
| 37 | 1 | 0 | -0.752260 | -1.776862 | 5.451917  |
| 38 | 6 | 0 | 0.277302  | -3.640759 | 5.158124  |
| 39 | 1 | 0 | -0.118847 | -4.085324 | 6.067549  |
| 40 | 6 | 0 | 1.125853  | -4.377674 | 4.329432  |
| 41 | 1 | 0 | 1.394190  | -5.396613 | 4.597271  |
| 42 | 6 | 0 | 1.615459  | -3.813228 | 3.153487  |
| 43 | 1 | 0 | 2.262742  | -4.387957 | 2.496643  |
| 44 | 6 | 0 | 1.268302  | -2.507576 | 2.807432  |
| 45 | 1 | 0 | 1.621872  | -2.073656 | 1.876442  |
| 46 | 6 | 0 | 1.522734  | -0.611110 | -3.003789 |
| 47 | 6 | 0 | 0.127321  | -0.803329 | -2.760168 |
| 48 | 6 | 0 | -0.653974 | -1.196786 | -3.889294 |
| 49 | 1 | 0 | -1.717714 | -1.335234 | -3.718051 |
| 50 | 6 | 0 | -0.092181 | -1.406411 | -5.130225 |
| 51 | 1 | 0 | -0.730784 | -1.711935 | -5.956965 |
| 52 | 6 | 0 | 1.286766  | -1.228902 | -5.346444 |
| 53 | 1 | 0 | 1.722396  | -1.387506 | -6.328440 |
| 54 | 6 | 0 | 2.074326  | -0.827919 | -4.284158 |
| 55 | 1 | 0 | 3.138329  | -0.661668 | -4.441093 |
| 56 | 6 | 0 | 3.799674  | 1.115389  | -2.405692 |
| 57 | 6 | 0 | 3.362674  | 2.428142  | -2.637939 |
| 58 | 1 | 0 | 2.352015  | 2.710486  | -2.354928 |
| 59 | 6 | 0 | 4.216355  | 3.356650  | -3.225967 |
| 60 | 1 | 0 | 3.870954  | 4.372289  | -3.400252 |
| 61 | 6 | 0 | 5.509837  | 2.983196  | -3.594656 |
| 62 | 1 | 0 | 6.174792  | 3.709159  | -4.055635 |
| 63 | 6 | 0 | 5.946800  | 1.678363  | -3.375896 |
| 64 | 1 | 0 | 6.951806  | 1.382860  | -3.665852 |
| 65 | 6 | 0 | 5.096150  | 0.745307  | -2.782780 |
| 66 | 1 | 0 | 5.445060  | -0.269489 | -2.614418 |
| 67 | 6 | 0 | 3.577290  | -1.474326 | -1.083931 |
| 68 | 6 | 0 | 3.196318  | -2.780352 | -1.416192 |
| 69 | 1 | 0 | 2.367000  | -2.938037 | -2.100398 |
| 70 | 6 | 0 | 3.877033  | -3.871469 | -0.876081 |
| 71 | 1 | 0 | 3.574896  | -4.880352 | -1.145077 |
| 72 | 6 | 0 | 4.943035  | -3.668821 | -0.001118 |
| 73 | 1 | 0 | 5.477146  | -4.519825 | 0.414140  |
| 74 | 6 | 0 | 5.327163  | -2.370424 | 0.339703  |
| 75 | 1 | 0 | 6.158405  | -2.208304 | 1.021246  |
| 76 | 6 | 0 | 4.647277  | -1.279554 | -0.195494 |
| 77 | 1 | 0 | 4.957315  | -0.272457 | 0.073896  |

1  
A

2  
A

3  
A

|             |    |        |         |         |
|-------------|----|--------|---------|---------|
| Frequencies | -- | 7.0978 | 13.3051 | 19.6091 |
| Red. masses | -- | 5.3382 | 5.8200  | 4.7240  |
| Frc consts  | -- | 0.0002 | 0.0006  | 0.0011  |
| IR Inten    | -- | 0.0045 | 0.6007  | 0.1290  |

| Atom | AN | X     | Y     | Z     | X     | Y     | Z     | X     | Y     | Z     |
|------|----|-------|-------|-------|-------|-------|-------|-------|-------|-------|
| 1    | 28 | 0.00  | 0.00  | 0.01  | 0.04  | -0.07 | 0.03  | 0.01  | -0.01 | 0.00  |
| 2    | 15 | 0.00  | 0.00  | 0.00  | 0.01  | -0.01 | 0.02  | 0.02  | 0.01  | -0.01 |
| 3    | 15 | 0.00  | 0.00  | 0.01  | 0.01  | 0.00  | -0.02 | -0.03 | 0.02  | 0.00  |
| 4    | 8  | 0.00  | 0.01  | 0.02  | 0.06  | -0.11 | 0.05  | 0.05  | -0.08 | 0.04  |
| 5    | 8  | 0.00  | -0.02 | 0.01  | 0.03  | -0.08 | 0.03  | 0.00  | -0.03 | 0.01  |
| 6    | 7  | 0.00  | 0.02  | 0.00  | 0.04  | -0.05 | 0.02  | 0.01  | 0.03  | -0.01 |
| 7    | 7  | 0.00  | 0.00  | 0.00  | 0.02  | -0.04 | 0.02  | -0.03 | 0.05  | -0.02 |
| 8    | 6  | 0.00  | 0.02  | 0.00  | 0.03  | -0.05 | 0.02  | -0.01 | 0.09  | -0.03 |
| 9    | 1  | 0.01  | 0.03  | 0.00  | 0.04  | -0.05 | 0.01  | 0.02  | 0.12  | -0.02 |
| 10   | 1  | 0.00  | 0.03  | -0.01 | 0.03  | -0.05 | 0.02  | -0.04 | 0.11  | -0.04 |
| 11   | 6  | -0.01 | 0.02  | -0.01 | 0.03  | -0.04 | 0.02  | -0.05 | 0.08  | -0.04 |
| 12   | 1  | -0.02 | 0.01  | -0.02 | 0.03  | -0.04 | 0.03  | -0.08 | 0.06  | -0.05 |
| 13   | 1  | -0.01 | 0.02  | -0.01 | 0.02  | -0.05 | 0.01  | -0.06 | 0.11  | -0.05 |
| 14   | 6  | 0.00  | 0.05  | 0.00  | 0.01  | 0.01  | -0.01 | 0.02  | -0.01 | 0.00  |
| 15   | 6  | -0.01 | 0.04  | 0.00  | 0.04  | -0.05 | 0.00  | 0.03  | -0.06 | 0.02  |
| 16   | 6  | -0.01 | 0.08  | 0.00  | 0.04  | -0.03 | -0.03 | 0.04  | -0.08 | 0.01  |
| 17   | 1  | -0.01 | 0.08  | 0.00  | 0.06  | -0.08 | -0.02 | 0.05  | -0.12 | 0.02  |
| 18   | 6  | 0.00  | 0.12  | -0.02 | 0.02  | 0.04  | -0.07 | 0.03  | -0.05 | -0.01 |
| 19   | 1  | -0.01 | 0.15  | -0.02 | 0.02  | 0.05  | -0.10 | 0.03  | -0.06 | -0.01 |
| 20   | 6  | 0.00  | 0.13  | -0.02 | -0.01 | 0.11  | -0.09 | 0.02  | 0.00  | -0.03 |
| 21   | 1  | 0.00  | 0.16  | -0.03 | -0.02 | 0.17  | -0.13 | 0.01  | 0.03  | -0.04 |
| 22   | 6  | 0.00  | 0.09  | -0.01 | -0.01 | 0.09  | -0.06 | 0.02  | 0.02  | -0.02 |
| 23   | 1  | 0.01  | 0.10  | -0.01 | -0.03 | 0.14  | -0.07 | 0.01  | 0.07  | -0.03 |
| 24   | 6  | 0.03  | -0.03 | 0.02  | 0.00  | 0.02  | 0.00  | 0.01  | 0.00  | 0.00  |
| 25   | 6  | 0.11  | 0.00  | 0.01  | 0.07  | 0.04  | -0.07 | 0.09  | 0.02  | -0.05 |
| 26   | 1  | 0.17  | 0.05  | -0.02 | 0.13  | 0.04  | -0.12 | 0.18  | 0.05  | -0.11 |
| 27   | 6  | 0.13  | -0.03 | 0.03  | 0.06  | 0.05  | -0.08 | 0.07  | 0.02  | -0.04 |
| 28   | 1  | 0.20  | -0.01 | 0.03  | 0.11  | 0.07  | -0.14 | 0.13  | 0.04  | -0.08 |
| 29   | 6  | 0.06  | -0.10 | 0.06  | -0.02 | 0.05  | -0.03 | -0.04 | -0.02 | 0.03  |
| 30   | 1  | 0.07  | -0.12 | 0.08  | -0.03 | 0.06  | -0.04 | -0.06 | -0.03 | 0.05  |
| 31   | 6  | -0.03 | -0.13 | 0.07  | -0.09 | 0.03  | 0.05  | -0.12 | -0.05 | 0.09  |
| 32   | 1  | -0.09 | -0.18 | 0.10  | -0.15 | 0.03  | 0.09  | -0.21 | -0.08 | 0.14  |
| 33   | 6  | -0.05 | -0.10 | 0.05  | -0.08 | 0.01  | 0.06  | -0.09 | -0.04 | 0.07  |
| 34   | 1  | -0.11 | -0.12 | 0.06  | -0.13 | -0.01 | 0.11  | -0.16 | -0.06 | 0.11  |
| 35   | 6  | -0.04 | -0.02 | -0.04 | -0.04 | -0.01 | 0.07  | 0.04  | 0.01  | -0.03 |
| 36   | 6  | -0.11 | -0.06 | -0.09 | -0.10 | 0.01  | 0.05  | -0.04 | -0.05 | -0.09 |
| 37   | 1  | -0.16 | -0.08 | -0.12 | -0.14 | 0.02  | 0.00  | -0.13 | -0.10 | -0.14 |
| 38   | 6  | -0.14 | -0.07 | -0.11 | -0.12 | 0.02  | 0.09  | -0.01 | -0.04 | -0.09 |
| 39   | 1  | -0.19 | -0.10 | -0.15 | -0.17 | 0.03  | 0.07  | -0.07 | -0.08 | -0.14 |
| 40   | 6  | -0.08 | -0.04 | -0.08 | -0.08 | 0.00  | 0.15  | 0.10  | 0.02  | -0.03 |
| 41   | 1  | -0.10 | -0.05 | -0.10 | -0.09 | 0.01  | 0.18  | 0.13  | 0.03  | -0.04 |
| 42   | 6  | -0.01 | 0.00  | -0.03 | -0.01 | -0.02 | 0.16  | 0.18  | 0.08  | 0.02  |
| 43   | 1  | 0.02  | 0.02  | -0.01 | 0.02  | -0.03 | 0.21  | 0.27  | 0.12  | 0.07  |
| 44   | 6  | 0.01  | 0.01  | -0.01 | 0.01  | -0.02 | 0.12  | 0.15  | 0.07  | 0.03  |
| 45   | 1  | 0.06  | 0.03  | 0.02  | 0.06  | -0.04 | 0.13  | 0.21  | 0.10  | 0.07  |
| 46   | 6  | 0.01  | -0.05 | 0.02  | -0.01 | 0.03  | -0.02 | -0.02 | 0.03  | -0.01 |
| 47   | 6  | 0.01  | -0.05 | 0.02  | 0.00  | -0.02 | 0.01  | -0.01 | 0.00  | 0.00  |
| 48   | 6  | 0.02  | -0.09 | 0.03  | -0.01 | 0.00  | 0.02  | -0.02 | 0.01  | 0.00  |
| 49   | 1  | 0.02  | -0.09 | 0.03  | -0.01 | -0.04 | 0.04  | -0.02 | -0.01 | 0.01  |
| 50   | 6  | 0.02  | -0.13 | 0.04  | -0.04 | 0.07  | -0.01 | -0.03 | 0.04  | -0.01 |
| 51   | 1  | 0.03  | -0.16 | 0.05  | -0.05 | 0.08  | 0.00  | -0.03 | 0.04  | -0.01 |
| 52   | 6  | 0.02  | -0.12 | 0.04  | -0.05 | 0.12  | -0.03 | -0.04 | 0.07  | -0.02 |
| 53   | 1  | 0.03  | -0.15 | 0.05  | -0.07 | 0.17  | -0.05 | -0.04 | 0.09  | -0.03 |
| 54   | 6  | 0.01  | -0.09 | 0.03  | -0.04 | 0.09  | -0.04 | -0.03 | 0.06  | -0.02 |
| 55   | 1  | 0.01  | -0.08 | 0.03  | -0.04 | 0.13  | -0.06 | -0.04 | 0.08  | -0.03 |
| 56   | 6  | -0.03 | 0.02  | -0.02 | -0.01 | 0.02  | 0.00  | 0.00  | -0.01 | 0.00  |
| 57   | 6  | -0.06 | 0.00  | -0.04 | -0.03 | 0.02  | 0.03  | 0.03  | -0.01 | -0.04 |
| 58   | 1  | -0.06 | -0.01 | -0.03 | -0.03 | 0.01  | 0.04  | 0.03  | 0.01  | -0.07 |
| 59   | 6  | -0.09 | 0.01  | -0.06 | -0.04 | 0.05  | 0.04  | 0.06  | -0.04 | -0.04 |
| 60   | 1  | -0.11 | 0.00  | -0.07 | -0.06 | 0.05  | 0.07  | 0.08  | -0.04 | -0.07 |
| 61   | 6  | -0.08 | 0.04  | -0.07 | -0.04 | 0.07  | 0.02  | 0.06  | -0.06 | -0.01 |

|    |   |       |       |       |       |       |       |       |       |       |
|----|---|-------|-------|-------|-------|-------|-------|-------|-------|-------|
| 62 | 1 | -0.11 | 0.04  | -0.09 | -0.05 | 0.09  | 0.03  | 0.08  | -0.09 | -0.01 |
| 63 | 6 | -0.05 | 0.05  | -0.06 | -0.03 | 0.07  | -0.01 | 0.03  | -0.07 | 0.03  |
| 64 | 1 | -0.05 | 0.07  | -0.07 | -0.02 | 0.09  | -0.02 | 0.04  | -0.09 | 0.06  |
| 65 | 6 | -0.03 | 0.04  | -0.03 | -0.01 | 0.05  | -0.02 | 0.01  | -0.04 | 0.03  |
| 66 | 1 | 0.00  | 0.05  | -0.02 | 0.00  | 0.05  | -0.04 | -0.01 | -0.04 | 0.06  |
| 67 | 6 | 0.04  | 0.03  | 0.02  | 0.02  | -0.01 | -0.07 | -0.06 | 0.01  | 0.03  |
| 68 | 6 | 0.07  | 0.02  | 0.05  | 0.03  | -0.01 | -0.10 | -0.07 | 0.01  | 0.03  |
| 69 | 1 | 0.06  | -0.01 | 0.06  | 0.03  | 0.01  | -0.10 | -0.06 | 0.02  | 0.01  |
| 70 | 6 | 0.09  | 0.04  | 0.06  | 0.04  | -0.02 | -0.14 | -0.10 | 0.01  | 0.05  |
| 71 | 1 | 0.11  | 0.03  | 0.09  | 0.05  | -0.01 | -0.16 | -0.11 | 0.01  | 0.05  |
| 72 | 6 | 0.10  | 0.08  | 0.05  | 0.05  | -0.03 | -0.14 | -0.12 | 0.00  | 0.07  |
| 73 | 1 | 0.12  | 0.10  | 0.06  | 0.05  | -0.04 | -0.16 | -0.14 | -0.01 | 0.09  |
| 74 | 6 | 0.08  | 0.10  | 0.02  | 0.04  | -0.04 | -0.10 | -0.11 | 0.00  | 0.07  |
| 75 | 1 | 0.08  | 0.13  | 0.01  | 0.04  | -0.05 | -0.10 | -0.12 | -0.01 | 0.09  |
| 76 | 6 | 0.05  | 0.07  | 0.01  | 0.03  | -0.03 | -0.07 | -0.08 | 0.00  | 0.05  |
| 77 | 1 | 0.03  | 0.09  | -0.02 | 0.02  | -0.04 | -0.04 | -0.07 | 0.00  | 0.05  |

### Optimized structure of [Ni(phosphasalen)] complex in triplet state

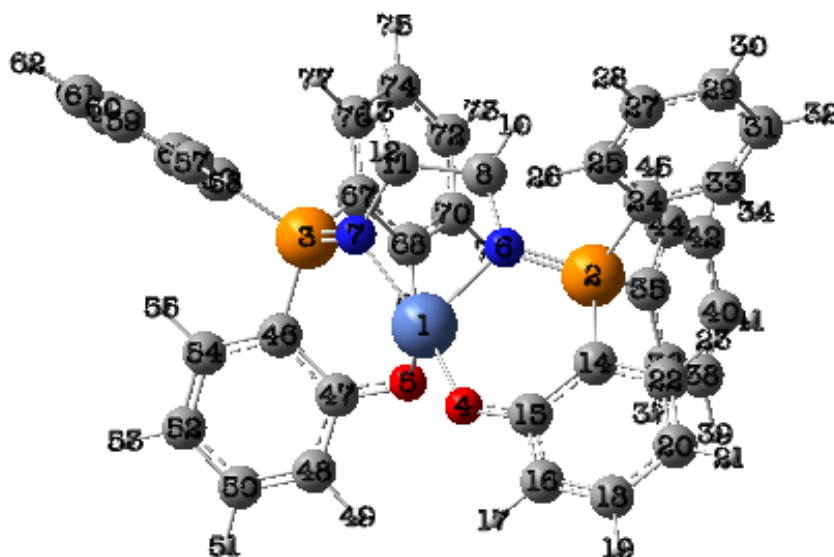

HF=-2578.6191862

| Center Number | Atomic Number | Atomic Type | Coordinates (Angstroms) |           |           |
|---------------|---------------|-------------|-------------------------|-----------|-----------|
|               |               |             | X                       | Y         | Z         |
| 1             | 28            | 0           | 0.391424                | -0.586373 | 0.087925  |
| 2             | 15            | 0           | -0.031022               | -0.075297 | 3.117395  |
| 3             | 15            | 0           | 3.056662                | -0.159518 | -1.493694 |
| 4             | 8             | 0           | -1.425223               | -1.098519 | 0.405304  |
| 5             | 8             | 0           | 1.187057                | -2.302429 | -0.398357 |
| 6             | 7             | 0           | 0.665620                | 0.430601  | 1.748464  |
| 7             | 7             | 0           | 1.855088                | 0.559799  | -0.680194 |
| 8             | 6             | 0           | 1.963349                | 1.096551  | 1.718824  |
| 9             | 1             | 0           | 2.781299                | 0.401413  | 1.966678  |
| 10            | 1             | 0           | 2.012855                | 1.939049  | 2.427011  |
| 11            | 6             | 0           | 2.163599                | 1.615434  | 0.290424  |
| 12            | 1             | 0           | 1.471195                | 2.452902  | 0.123263  |
| 13            | 1             | 0           | 3.182859                | 2.016620  | 0.189747  |
| 14            | 6             | 0           | -1.685060               | -0.674607 | 2.785751  |
| 15            | 6             | 0           | -2.135382               | -1.086238 | 1.486917  |
| 16            | 6             | 0           | -3.491281               | -1.522115 | 1.404467  |
| 17            | 1             | 0           | -3.838870               | -1.826761 | 0.421142  |
| 18            | 6             | 0           | -4.322292               | -1.568715 | 2.503547  |
| 19            | 1             | 0           | -5.347001               | -1.915116 | 2.383332  |
| 20            | 6             | 0           | -3.863851               | -1.173898 | 3.771279  |
| 21            | 1             | 0           | -4.518355               | -1.204726 | 4.637291  |
| 22            | 6             | 0           | -2.560568               | -0.729265 | 3.892431  |
| 23            | 1             | 0           | -2.204948               | -0.403861 | 4.867900  |
| 24            | 6             | 0           | -0.164519               | 1.319905  | 4.294534  |
| 25            | 6             | 0           | -0.479234               | 2.576250  | 3.757035  |

|    |   |   |           |           |           |
|----|---|---|-----------|-----------|-----------|
| 26 | 1 | 0 | -0.600012 | 2.678181  | 2.681451  |
| 27 | 6 | 0 | -0.636056 | 3.678167  | 4.593202  |
| 28 | 1 | 0 | -0.878559 | 4.648659  | 4.168078  |
| 29 | 6 | 0 | -0.485639 | 3.535683  | 5.973309  |
| 30 | 1 | 0 | -0.610562 | 4.396178  | 6.625740  |
| 31 | 6 | 0 | -0.177384 | 2.289131  | 6.514993  |
| 32 | 1 | 0 | -0.061508 | 2.174268  | 7.589673  |
| 33 | 6 | 0 | -0.014576 | 1.183823  | 5.679852  |
| 34 | 1 | 0 | 0.231095  | 0.216350  | 6.108916  |
| 35 | 6 | 0 | 0.912286  | -1.371391 | 4.000565  |
| 36 | 6 | 0 | 0.461765  | -2.697300 | 3.988897  |
| 37 | 1 | 0 | -0.493121 | -2.935863 | 3.528876  |
| 38 | 6 | 0 | 1.232654  | -3.705789 | 4.564415  |
| 39 | 1 | 0 | 0.872587  | -4.731137 | 4.552308  |
| 40 | 6 | 0 | 2.459440  | -3.400850 | 5.151867  |
| 41 | 1 | 0 | 3.058238  | -4.188718 | 5.602021  |
| 42 | 6 | 0 | 2.919603  | -2.083598 | 5.161383  |
| 43 | 1 | 0 | 3.876707  | -1.842366 | 5.616846  |
| 44 | 6 | 0 | 2.152444  | -1.073030 | 4.587155  |
| 45 | 1 | 0 | 2.516252  | -0.048521 | 4.605622  |
| 46 | 6 | 0 | 2.425491  | -1.601842 | -2.345404 |
| 47 | 6 | 0 | 1.567153  | -2.498361 | -1.632372 |
| 48 | 6 | 0 | 1.152493  | -3.667309 | -2.323758 |
| 49 | 1 | 0 | 0.503477  | -4.352392 | -1.785454 |
| 50 | 6 | 0 | 1.545040  | -3.918538 | -3.625500 |
| 51 | 1 | 0 | 1.199133  | -4.824071 | -4.120364 |
| 52 | 6 | 0 | 2.369930  | -3.020836 | -4.318946 |
| 53 | 1 | 0 | 2.663222  | -3.215564 | -5.346368 |
| 54 | 6 | 0 | 2.801055  | -1.872683 | -3.673828 |
| 55 | 1 | 0 | 3.434850  | -1.169230 | -4.206531 |
| 56 | 6 | 0 | 3.761846  | 0.978726  | -2.740335 |
| 57 | 6 | 0 | 2.976765  | 2.068515  | -3.134502 |
| 58 | 1 | 0 | 2.004837  | 2.210362  | -2.669233 |
| 59 | 6 | 0 | 3.437747  | 2.949513  | -4.111317 |
| 60 | 1 | 0 | 2.823162  | 3.794848  | -4.409891 |
| 61 | 6 | 0 | 4.681904  | 2.744203  | -4.705891 |
| 62 | 1 | 0 | 5.040392  | 3.430579  | -5.468912 |
| 63 | 6 | 0 | 5.467309  | 1.656065  | -4.323278 |
| 64 | 1 | 0 | 6.436627  | 1.492484  | -4.787173 |
| 65 | 6 | 0 | 5.011997  | 0.776758  | -3.342993 |
| 66 | 1 | 0 | 5.631025  | -0.065697 | -3.045192 |
| 67 | 6 | 0 | 4.479293  | -0.643490 | -0.440937 |
| 68 | 6 | 0 | 4.448647  | -1.885352 | 0.212647  |
| 69 | 1 | 0 | 3.611258  | -2.557919 | 0.053903  |
| 70 | 6 | 0 | 5.473093  | -2.241999 | 1.085734  |
| 71 | 1 | 0 | 5.440786  | -3.208091 | 1.582561  |
| 72 | 6 | 0 | 6.532652  | -1.365969 | 1.324709  |
| 73 | 1 | 0 | 7.332209  | -1.650082 | 2.004496  |
| 74 | 6 | 0 | 6.562760  | -0.124699 | 0.692123  |
| 75 | 1 | 0 | 7.383200  | 0.564232  | 0.877114  |
| 76 | 6 | 0 | 5.541119  | 0.236700  | -0.185631 |
| 77 | 1 | 0 | 5.581722  | 1.203214  | -0.680843 |

---

|                | 1      | 2       | 3       |
|----------------|--------|---------|---------|
|                | A      | A       | A       |
| Frequencies -- | 6.5842 | 12.4026 | 19.7920 |
| Red. masses -- | 5.9642 | 6.1973  | 5.3852  |
| Frc consts --  | 0.0002 | 0.0006  | 0.0012  |

| IR Inten |    | --    | 0.0957 |       |       | 0.3318 |       |       | 0.6315 |       |  |
|----------|----|-------|--------|-------|-------|--------|-------|-------|--------|-------|--|
| Atom     | AN | X     | Y      | Z     | X     | Y      | Z     | X     | Y      | Z     |  |
| 1        | 28 | 0.01  | 0.00   | 0.01  | 0.05  | -0.05  | 0.03  | -0.02 | -0.05  | -0.01 |  |
| 2        | 15 | -0.02 | 0.00   | -0.01 | 0.00  | -0.02  | 0.03  | 0.01  | -0.01  | 0.00  |  |
| 3        | 15 | 0.01  | 0.00   | 0.01  | 0.02  | 0.00   | -0.01 | -0.02 | 0.00   | -0.02 |  |
| 4        | 8  | 0.01  | -0.01  | -0.01 | 0.05  | -0.06  | 0.02  | -0.01 | -0.09  | 0.05  |  |
| 5        | 8  | 0.05  | 0.00   | 0.07  | 0.06  | -0.03  | -0.01 | -0.04 | -0.04  | -0.09 |  |
| 6        | 7  | -0.01 | 0.03   | 0.00  | 0.04  | -0.06  | 0.03  | 0.00  | -0.04  | -0.02 |  |
| 7        | 7  | 0.01  | 0.00   | 0.01  | 0.04  | -0.03  | 0.04  | -0.05 | -0.02  | -0.04 |  |
| 8        | 6  | -0.01 | 0.02   | 0.00  | 0.04  | -0.07  | 0.05  | -0.03 | 0.00   | -0.05 |  |
| 9        | 1  | -0.01 | 0.01   | 0.01  | 0.04  | -0.07  | 0.04  | 0.00  | 0.02   | -0.07 |  |
| 10       | 1  | -0.01 | 0.02   | 0.00  | 0.05  | -0.08  | 0.06  | -0.03 | 0.00   | -0.05 |  |
| 11       | 6  | 0.00  | 0.01   | 0.00  | 0.05  | -0.04  | 0.05  | -0.08 | 0.00   | -0.05 |  |
| 12       | 1  | 0.00  | 0.01   | -0.01 | 0.05  | -0.03  | 0.07  | -0.11 | -0.03  | -0.05 |  |
| 13       | 1  | 0.00  | 0.01   | 0.01  | 0.05  | -0.05  | 0.06  | -0.10 | 0.04   | -0.08 |  |
| 14       | 6  | -0.03 | 0.05   | -0.02 | -0.01 | 0.00   | 0.00  | 0.00  | 0.01   | 0.03  |  |
| 15       | 6  | -0.01 | 0.03   | -0.02 | 0.02  | -0.02  | 0.00  | -0.01 | -0.03  | 0.04  |  |
| 16       | 6  | -0.02 | 0.07   | -0.04 | 0.02  | -0.01  | -0.03 | -0.02 | -0.01  | 0.06  |  |
| 17       | 1  | -0.01 | 0.06   | -0.05 | 0.04  | -0.03  | -0.03 | -0.02 | -0.04  | 0.07  |  |
| 18       | 6  | -0.05 | 0.12   | -0.06 | -0.01 | 0.04   | -0.05 | -0.02 | 0.05   | 0.06  |  |
| 19       | 1  | -0.06 | 0.14   | -0.08 | -0.02 | 0.05   | -0.06 | -0.03 | 0.07   | 0.07  |  |
| 20       | 6  | -0.07 | 0.13   | -0.06 | -0.04 | 0.07   | -0.05 | -0.02 | 0.10   | 0.04  |  |
| 21       | 1  | -0.09 | 0.17   | -0.07 | -0.06 | 0.10   | -0.06 | -0.02 | 0.14   | 0.04  |  |
| 22       | 6  | -0.06 | 0.10   | -0.04 | -0.04 | 0.05   | -0.02 | -0.01 | 0.07   | 0.03  |  |
| 23       | 1  | -0.07 | 0.11   | -0.04 | -0.06 | 0.07   | -0.02 | 0.00  | 0.11   | 0.02  |  |
| 24       | 6  | 0.02  | -0.02  | 0.03  | -0.01 | 0.01   | -0.01 | 0.05  | 0.01   | -0.02 |  |
| 25       | 6  | 0.03  | -0.01  | 0.06  | 0.02  | 0.00   | -0.05 | 0.03  | 0.00   | -0.03 |  |
| 26       | 1  | 0.01  | 0.02   | 0.07  | 0.04  | -0.02  | -0.05 | -0.03 | -0.02  | -0.02 |  |
| 27       | 6  | 0.06  | -0.02  | 0.09  | 0.02  | 0.02   | -0.08 | 0.07  | 0.01   | -0.04 |  |
| 28       | 1  | 0.06  | -0.01  | 0.12  | 0.04  | 0.02   | -0.10 | 0.05  | 0.00   | -0.05 |  |
| 29       | 6  | 0.07  | -0.06  | 0.09  | -0.01 | 0.05   | -0.07 | 0.14  | 0.04   | -0.04 |  |
| 30       | 1  | 0.10  | -0.08  | 0.11  | -0.01 | 0.07   | -0.09 | 0.17  | 0.05   | -0.05 |  |
| 31       | 6  | 0.06  | -0.08  | 0.05  | -0.04 | 0.06   | -0.03 | 0.16  | 0.05   | -0.04 |  |
| 32       | 1  | 0.08  | -0.11  | 0.05  | -0.06 | 0.09   | -0.03 | 0.22  | 0.07   | -0.04 |  |
| 33       | 6  | 0.03  | -0.06  | 0.02  | -0.04 | 0.04   | 0.00  | 0.12  | 0.03   | -0.02 |  |
| 34       | 1  | 0.02  | -0.08  | -0.01 | -0.06 | 0.05   | 0.02  | 0.14  | 0.04   | -0.02 |  |
| 35       | 6  | -0.04 | -0.04  | -0.04 | -0.05 | -0.02  | 0.08  | 0.00  | -0.02  | 0.00  |  |
| 36       | 6  | -0.08 | -0.03  | -0.06 | -0.09 | 0.00   | 0.13  | -0.06 | 0.00   | 0.08  |  |
| 37       | 1  | -0.09 | 0.01   | -0.05 | -0.09 | 0.01   | 0.12  | -0.08 | 0.02   | 0.12  |  |
| 38       | 6  | -0.10 | -0.06  | -0.09 | -0.13 | -0.01  | 0.18  | -0.07 | -0.01  | 0.09  |  |
| 39       | 1  | -0.13 | -0.05  | -0.10 | -0.16 | 0.00   | 0.22  | -0.12 | 0.01   | 0.15  |  |
| 40       | 6  | -0.09 | -0.10  | -0.09 | -0.14 | -0.02  | 0.19  | -0.04 | -0.03  | 0.03  |  |
| 41       | 1  | -0.11 | -0.13  | -0.11 | -0.17 | -0.02  | 0.23  | -0.05 | -0.04  | 0.04  |  |
| 42       | 6  | -0.05 | -0.12  | -0.08 | -0.10 | -0.03  | 0.15  | 0.01  | -0.05  | -0.04 |  |
| 43       | 1  | -0.04 | -0.15  | -0.08 | -0.10 | -0.04  | 0.16  | 0.04  | -0.07  | -0.09 |  |
| 44       | 6  | -0.03 | -0.08  | -0.05 | -0.05 | -0.03  | 0.09  | 0.03  | -0.04  | -0.06 |  |
| 45       | 1  | 0.00  | -0.10  | -0.04 | -0.02 | -0.04  | 0.06  | 0.08  | -0.06  | -0.11 |  |
| 46       | 6  | 0.03  | -0.03  | 0.05  | 0.01  | 0.02   | -0.02 | 0.02  | -0.01  | -0.04 |  |
| 47       | 6  | 0.05  | -0.03  | 0.08  | 0.03  | -0.01  | -0.02 | 0.01  | -0.02  | -0.07 |  |
| 48       | 6  | 0.07  | -0.05  | 0.11  | 0.03  | 0.01   | -0.04 | 0.05  | -0.02  | -0.10 |  |
| 49       | 1  | 0.09  | -0.05  | 0.13  | 0.04  | -0.01  | -0.03 | 0.04  | -0.03  | -0.12 |  |
| 50       | 6  | 0.07  | -0.08  | 0.11  | 0.00  | 0.03   | -0.05 | 0.11  | -0.02  | -0.08 |  |
| 51       | 1  | 0.08  | -0.10  | 0.14  | -0.01 | 0.04   | -0.06 | 0.14  | -0.02  | -0.10 |  |
| 52       | 6  | 0.04  | -0.08  | 0.09  | -0.03 | 0.05   | -0.05 | 0.12  | -0.01  | -0.04 |  |
| 53       | 1  | 0.04  | -0.10  | 0.09  | -0.05 | 0.08   | -0.06 | 0.17  | 0.00   | -0.03 |  |
| 54       | 6  | 0.03  | -0.05  | 0.05  | -0.02 | 0.04   | -0.04 | 0.08  | 0.00   | -0.02 |  |
| 55       | 1  | 0.01  | -0.06  | 0.03  | -0.04 | 0.06   | -0.04 | 0.10  | 0.01   | 0.00  |  |
| 56       | 6  | -0.03 | -0.01  | -0.03 | -0.02 | 0.03   | -0.01 | -0.01 | 0.02   | 0.01  |  |
| 57       | 6  | -0.05 | -0.03  | -0.04 | -0.04 | 0.04   | 0.04  | -0.04 | -0.01  | -0.02 |  |
| 58       | 1  | -0.05 | -0.04  | -0.02 | -0.03 | 0.02   | 0.07  | -0.06 | -0.04  | -0.07 |  |
| 59       | 6  | -0.08 | -0.04  | -0.06 | -0.08 | 0.06   | 0.04  | -0.02 | 0.01   | 0.00  |  |
| 60       | 1  | -0.10 | -0.06  | -0.07 | -0.10 | 0.06   | 0.08  | -0.04 | -0.02  | -0.03 |  |
| 61       | 6  | -0.09 | -0.03  | -0.07 | -0.10 | 0.08   | 0.00  | 0.01  | 0.05   | 0.05  |  |
| 62       | 1  | -0.11 | -0.04  | -0.09 | -0.12 | 0.10   | 0.00  | 0.02  | 0.07   | 0.07  |  |
| 63       | 6  | -0.06 | -0.01  | -0.06 | -0.08 | 0.08   | -0.04 | 0.03  | 0.08   | 0.09  |  |
| 64       | 1  | -0.07 | 0.00   | -0.07 | -0.09 | 0.10   | -0.07 | 0.06  | 0.12   | 0.13  |  |

|    |   |       |      |       |       |       |       |       |       |       |
|----|---|-------|------|-------|-------|-------|-------|-------|-------|-------|
| 65 | 6 | -0.03 | 0.00 | -0.04 | -0.04 | 0.06  | -0.05 | 0.02  | 0.07  | 0.07  |
| 66 | 1 | -0.01 | 0.02 | -0.03 | -0.02 | 0.06  | -0.08 | 0.04  | 0.09  | 0.10  |
| 67 | 6 | 0.03  | 0.06 | 0.00  | 0.05  | -0.01 | -0.06 | -0.04 | 0.01  | 0.02  |
| 68 | 6 | 0.07  | 0.07 | 0.03  | 0.07  | -0.02 | -0.07 | -0.01 | -0.01 | -0.03 |
| 69 | 1 | 0.08  | 0.05 | 0.05  | 0.06  | -0.01 | -0.06 | 0.03  | -0.05 | -0.10 |
| 70 | 6 | 0.09  | 0.11 | 0.02  | 0.09  | -0.03 | -0.11 | -0.04 | 0.01  | 0.01  |
| 71 | 1 | 0.12  | 0.12 | 0.04  | 0.11  | -0.03 | -0.12 | -0.02 | -0.01 | -0.03 |
| 72 | 6 | 0.07  | 0.14 | -0.01 | 0.10  | -0.03 | -0.13 | -0.09 | 0.05  | 0.09  |
| 73 | 1 | 0.09  | 0.17 | -0.02 | 0.12  | -0.04 | -0.15 | -0.11 | 0.06  | 0.11  |
| 74 | 6 | 0.04  | 0.12 | -0.04 | 0.08  | -0.02 | -0.11 | -0.12 | 0.07  | 0.13  |
| 75 | 1 | 0.03  | 0.14 | -0.06 | 0.09  | -0.03 | -0.13 | -0.16 | 0.10  | 0.19  |
| 76 | 6 | 0.02  | 0.08 | -0.03 | 0.06  | -0.01 | -0.08 | -0.10 | 0.05  | 0.10  |
| 77 | 1 | -0.01 | 0.07 | -0.05 | 0.05  | -0.01 | -0.07 | -0.12 | 0.07  | 0.13  |
